# Supplementary material
Source: PubMed Central journal article supplement (PMC4876949)
Supplement: NIHMS785920-supplement-supplement_1.pdf [file NIHMS785920-supplement-supplement_1.pdf]

**Supplemental Table:** Adjusted estimates of absence by intervention group, assessing all pupils collectively and stratifying by sex with design variables and covariates.

| Parameter                        | Design Variables Only |        |                  | Full Model         |        |                  | Design Variables Only |        |                  | Full Model         |        |                  | Design Variables Only |        |                  | Full Model         |        |                  |
|----------------------------------|-----------------------|--------|------------------|--------------------|--------|------------------|-----------------------|--------|------------------|--------------------|--------|------------------|-----------------------|--------|------------------|--------------------|--------|------------------|
|                                  | Boys and Girls        |        |                  | Boys and Girls     |        |                  | Boys                  |        |                  | Boys               |        |                  | Girls                 |        |                  | Girls              |        |                  |
|                                  | Proportion absence    | 95% CI | p-value          | Proportion absence | 95% CI | p-value          | Proportion absence    | 95% CI | p-value          | Proportion absence | 95% CI | p-value          | Proportion absence    | 95% CI | p-value          | Proportion absence | 95% CI | p-value          |
| <b>Grades 1-8</b>                |                       |        |                  |                    |        |                  |                       |        |                  |                    |        |                  |                       |        |                  |                    |        |                  |
| Intercept                        | 0.125                 | 0.101  | 0.149 < 0.01 *** | 0.126              | 0.101  | 0.150 < 0.01 *** | 0.124                 | 0.096  | 0.152 < 0.01 *** | 0.126              | 0.098  | 0.155 < 0.01 *** | 0.126                 | 0.101  | 0.150 < 0.01 *** | 0.125              | 0.101  | 0.150 < 0.01 *** |
| HW Intervention                  | -0.006                | -0.034 | 0.021 0.15       | -0.003             | -0.031 | 0.025 0.83       | -0.003                | -0.033 | 0.027 0.83       | 0.001              | -0.031 | 0.028 0.93       | -0.008                | -0.037 | 0.021 0.59       | -0.005             | -0.033 | 0.023 0.73       |
| LC+HW Intervention               | -0.007                | -0.035 | 0.021 0.60       | 0.001              | -0.024 | 0.026 0.94       | -0.007                | -0.038 | 0.023 0.64       | -0.001             | -0.028 | 0.029 0.97       | -0.007                | -0.036 | 0.021 0.60       | 0.001              | -0.024 | 0.027 0.91       |
| Geographic Strata: Nyando/Kisumu | -0.025                | -0.468 | -0.003 0.03 **   | -0.018             | -0.041 | 0.004 0.11       | -0.023                | -0.047 | 0.000 0.05 *     | -0.018             | -0.043 | 0.007 0.15       | -0.026                | -0.049 | -0.003 0.03 **   | -0.018             | -0.041 | 0.005 0.12       |
| School-level Baseline Absence    | 0.282                 | 0.160  | 0.404 < 0.01 *** | 0.231              | 0.113  | 0.350 < 0.01 *** | 0.282                 | 0.142  | 0.422 < 0.01 *** | 0.232              | 0.091  | 0.372 < 0.05 **  | 0.282                 | 0.144  | 0.419 < 0.01 *** | 0.232              | 0.098  | 0.365 < 0.01 *** |
| Baseline School Enrollment       |                       |        |                  | 0.000              | 0.000  | 0.000 0.28       |                       |        |                  | 0.000              | 0.000  | 0.000 0.51       |                       |        |                  | 0.000              | 0.000  | 0.000 0.18       |
| Community SES                    |                       |        |                  | -0.037             | -0.073 | 0.000 0.05       |                       |        |                  | -0.040             | -0.078 | -0.001 0.04 **   |                       |        |                  | -0.033             | -0.074 | 0.008 0.12       |
| <b>Grades 1-3</b>                |                       |        |                  |                    |        |                  |                       |        |                  |                    |        |                  |                       |        |                  |                    |        |                  |
| Intercept                        | 0.141                 | 0.106  | 0.176 < 0.01 *** | 0.140              | 0.105  | 0.175 < 0.01 *** | 0.132                 | 0.086  | 0.177 0.00 **    | 0.131              | 0.085  | 0.178 0.00 **    | 0.151                 | 0.112  | 0.190 0.00 **    | 0.150              | 0.111  | 0.189 0.00 **    |
| HW Intervention                  | 0.010                 | -0.023 | 0.043 0.54       | 0.014              | -0.016 | 0.044 0.34       | 0.025                 | -0.009 | 0.059 0.15       | 0.028              | -0.004 | 0.060 0.09 *     | -0.004                | -0.042 | 0.034 0.84       | 0.001              | -0.033 | 0.035 0.95       |
| LC+HW Intervention               | 0.009                 | -0.026 | 0.045 0.60       | 0.020              | -0.012 | 0.051 0.22       | 0.025                 | -0.014 | 0.064 0.20       | 0.033              | -0.003 | 0.069 0.08 *     | -0.007                | -0.045 | 0.031 0.72       | 0.006              | -0.029 | 0.042 0.72       |
| Geographic Strata: Nyando/Kisumu | -0.027                | -0.054 | 0.000 0.05 *     | -0.017             | -0.044 | 0.011 0.22       | -0.028                | -0.057 | 0.001 0.06 *     | -0.020             | -0.053 | 0.012 0.22       | -0.027                | -0.058 | 0.003 0.07 *     | -0.014             | -0.043 | 0.014 0.32       |
| School-level Baseline Absence    | 0.101                 | -0.084 | 0.285 0.28       | 0.047              | -0.142 | 0.237 0.62       | 0.080                 | -0.149 | 0.310 0.49       | 0.040              | -0.199 | 0.278 0.74       | 0.114                 | -0.084 | 0.312 0.26       | 0.045              | -0.163 | 0.254 0.67       |
| Baseline School Enrollment       |                       |        |                  | 0.000              | 0.000  | 0.000 0.16       |                       |        |                  | 0.000              | 0.000  | 0.000 0.31       |                       |        |                  | 0.000              | 0.000  | 0.000 0.16       |
| Community SES                    |                       |        |                  | -0.040             | -0.095 | 0.015 0.15       |                       |        |                  | -0.032             | -0.087 | 0.023 0.25       |                       |        |                  | -0.049             | -0.120 | 0.021 0.17       |
| <b>Grades 4-7</b>                |                       |        |                  |                    |        |                  |                       |        |                  |                    |        |                  |                       |        |                  |                    |        |                  |
| Intercept                        | 0.135                 | 0.103  | 0.167 < 0.01 *** | 0.140              | 0.106  | 0.173 < 0.01 *** | 0.144                 | 0.104  | 0.184 0.00 **    | 0.151              | 0.109  | 0.194 0.00 **    | 0.126                 | 0.093  | 0.158 0.00 **    | 0.129              | 0.095  | 0.163 0.00 **    |
| HW Intervention                  | -0.020                | -0.049 | 0.009 0.17       | -0.018             | -0.047 | 0.011 0.22       | -0.022                | -0.056 | 0.012 0.20       | -0.020             | -0.054 | 0.014 0.24       | -0.018                | -0.046 | 0.010 0.20       | -0.016             | -0.045 | 0.012 0.25       |
| LC+HW Intervention               | -0.016                | -0.046 | 0.014 0.28       | -0.009             | -0.037 | 0.019 0.53       | -0.027                | -0.061 | 0.006 0.11       | -0.017             | -0.048 | 0.014 0.28       | -0.006                | -0.037 | 0.025 0.71       | -0.001             | -0.030 | 0.029 0.96       |
| Geographic Strata: Nyando/Kisumu | -0.023                | -0.047 | 0.000 0.05 *     | -0.020             | -0.045 | 0.005 0.11       | -0.021                | -0.048 | 0.006 0.12       | -0.018             | -0.046 | 0.010 0.20       | -0.025                | -0.048 | -0.001 0.04 **   | -0.023             | -0.049 | 0.003 0.09 *     |
| School-level Baseline Absence    | 0.335                 | 0.011  | 0.561 < 0.05 **  | 0.268              | 0.037  | 0.500 0.02 **    | 0.328                 | 0.064  | 0.591 0.02 **    | 0.239              | -0.052 | 0.529 0.11       | 0.340                 | 0.083  | 0.597 0.01 **    | 0.293              | 0.041  | 0.545 0.02 **    |
| Baseline School Enrollment       |                       |        |                  | 0.000              | 0.000  | 0.000 0.76       |                       |        |                  | 0.000              | 0.000  | 0.000 0.72       |                       |        |                  | 0.000              | 0.000  | 0.000 0.86       |
| Community SES                    |                       |        |                  | -0.038             | -0.082 | 0.007 0.10       |                       |        |                  | -0.050             | -0.097 | -0.002 0.04 **   |                       |        |                  | -0.026             | -0.077 | 0.024 0.30       |
| <b>Grades 8</b>                  |                       |        |                  |                    |        |                  |                       |        |                  |                    |        |                  |                       |        |                  |                    |        |                  |
| Intercept                        | 0.069                 | 0.039  | 0.100 < 0.01 *** | 0.067              | 0.036  | 0.098 < 0.01 *** | 0.077                 | 0.044  | 0.110 0.00 **    | 0.079              | 0.044  | 0.113 0.00 **    | 0.057                 | 0.014  | 0.100 0.01 **    | 0.050              | 0.011  | 0.088 0.01 **    |
| HW Intervention                  | 0.020                 | -0.041 | 0.081 0.51       | 0.020              | -0.040 | 0.080 0.50       | -0.005                | -0.051 | 0.041 0.81       | -0.007             | -0.052 | 0.038 0.76       | 0.060                 | -0.034 | 0.153 0.21       | 0.062              | -0.030 | 0.153 0.18       |
| LC+HW Intervention               | -0.024                | -0.058 | 0.011 0.18       | -0.013             | -0.046 | 0.019 0.41       | -0.027                | -0.058 | 0.005 0.09 *     | -0.018             | -0.050 | 0.014 0.26       | -0.022                | -0.077 | 0.034 0.44       | -0.008             | -0.059 | 0.044 0.77       |
| Geographic Strata: Nyando/Kisumu | -0.016                | -0.052 | 0.021 0.39       | -0.008             | -0.045 | 0.030 0.68       | -0.014                | -0.043 | 0.015 0.34       | -0.008             | -0.040 | 0.024 0.61       | -0.014                | -0.071 | 0.043 0.62       | -0.001             | -0.057 | 0.056 0.97       |
| School-level Baseline Absence    | 0.379                 | 0.184  | 0.575 < 0.01 *** | 0.339              | 0.142  | 0.536 < 0.01 *** | 0.283                 | 0.134  | 0.432 0.00 **    | 0.224              | 0.072  | 0.376 0.00 **    | 0.532                 | 0.202  | 0.862 0.00 **    | 0.501              | 0.171  | 0.832 0.00 **    |
| Baseline School Enrollment       |                       |        |                  | 0.000              | 0.000  | 0.000 0.65       |                       |        |                  | 0.000              | 0.000  | 0.000 0.90       |                       |        |                  | 0.000              | 0.000  | 0.000 0.36       |
| Community SES                    |                       |        |                  | -0.050             | -0.110 | 0.010 0.10       |                       |        |                  | -0.060             | -0.118 | -0.003 0.04 **   |                       |        |                  | -0.054             | -0.138 | 0.031 0.21       |

\* p=significance at a<0.1; \*\*p=significance at a<0.05; \*\*\*p=significance at a<0.001
